# Supplementary figures and images for: First Report on Coseismic Ionospheric Disturbances Following the Deep-Focus Earthquake (Mw 6.6) in Tarauacá, Acre, Brazil: Ground Uplift and TEC Analysis
Source: Copernicus journal article supplement (doi:10.5194/angeo-2024-16), 2024-09-19

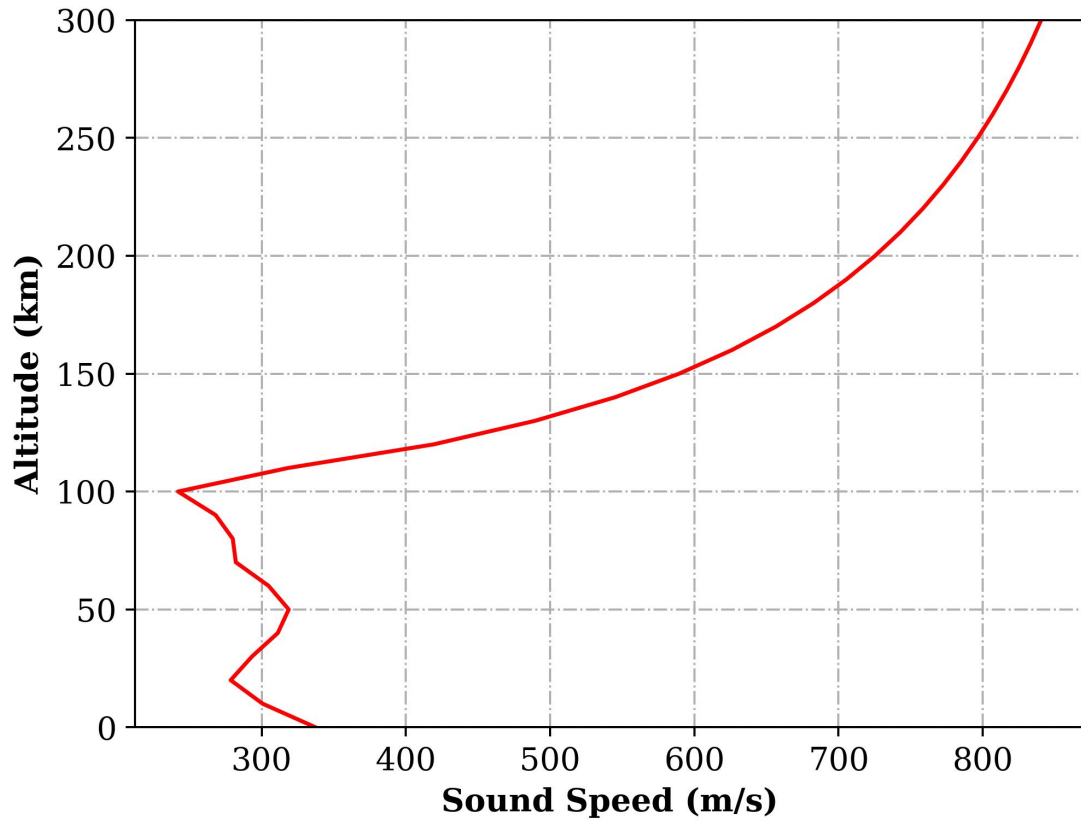

Figure S1: Sound speed profile at the epicentre for the day of earthquake

Supplement: Supplementary file 1 [file angeo-2024-16-supplement.pdf]
